# Supplementary material
Source: PubMed Central journal article supplement (PMC2186377)
Supplement: NIHMS36523-supplement-01.pdf [file NIHMS36523-supplement-01.pdf]

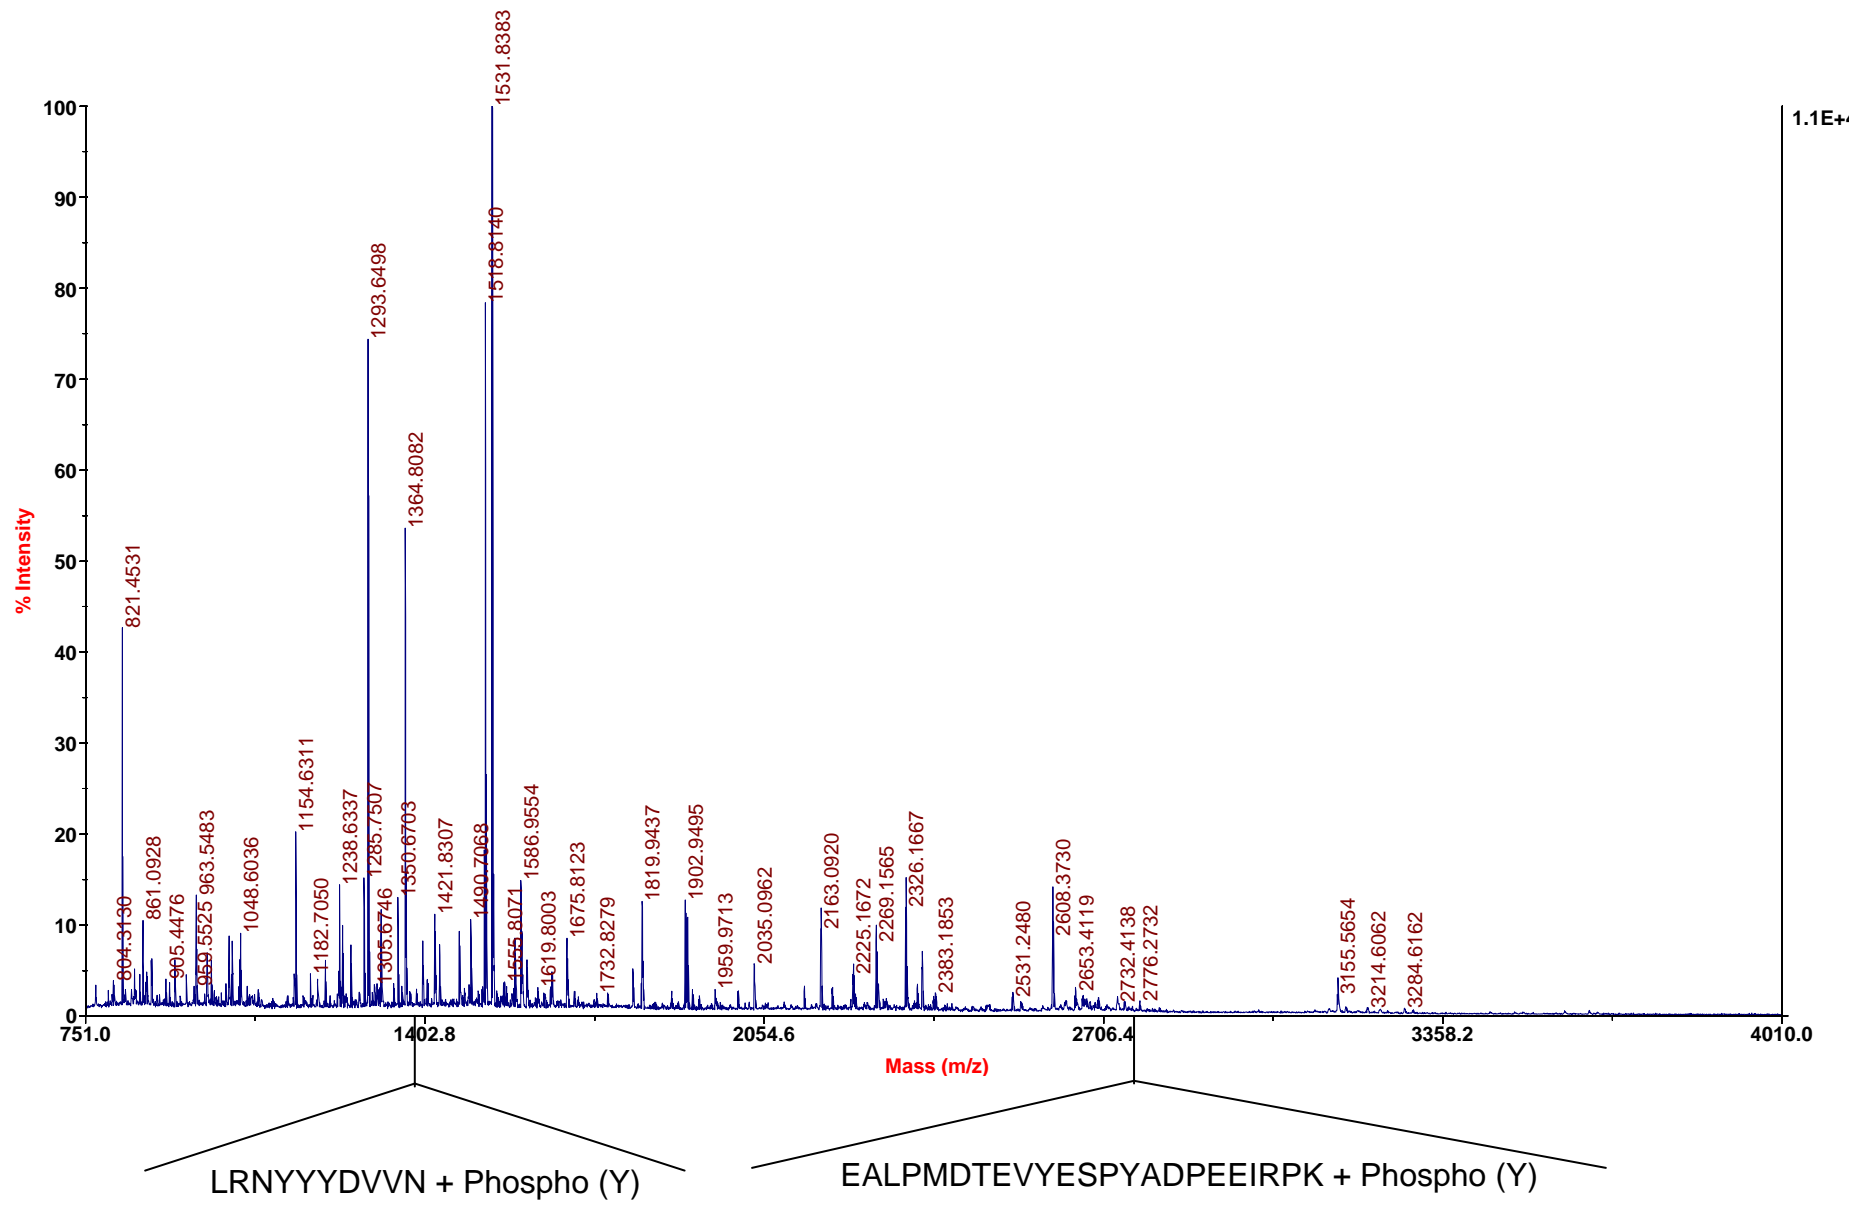

**Supplementary Fig S1.** Mass spectrometry data of phosphorylated Syk. Two of the peptides were sequenced and found to contained one phosphorylated tyrosine.
